# Supplementary material for: Enriched environment treatment reverses depression-like behavior and restores reduced hippocampal neurogenesis and protein levels of brain-derived neurotrophic factor in mice lacking its expression through promoter IV
Source: PubMed Central journal article supplement — Transl Psychiatry. 2011 Sep 13;1(9):e40–. doi: 10.1038/tp.2011.33 (PMC3309483; doi:10.1038/tp.2011.33), 2011-09-13
Supplement: tp201133x3.pdf [file tp201133x3.pdf]

**Supplementary Table 1.** Sequences and probes for qRT-PCR.

| Variants     | Primers           | With primers               | Probe | Orientations | Sequences                 |
|--------------|-------------------|----------------------------|-------|--------------|---------------------------|
| mExon I      | mBDNF 1           | 9AS1                       | 31    | Sense        | agtctccaggacagcaaagc      |
| mExon IIA    | mBDNF 2A          | 9AS2                       | 31    | Sense        | ggattgtccgaggtgtagt       |
| mExon IIB    | mBDNF 2B          | 9AS2                       | 31    | Sense        | gcggttagctggaataga        |
| mExon IIC    | mBDNF 2C          | 9AS6                       | 31    | Sense        | gtggtgaagccgcaaaga        |
| mExon III    | mBDNF 3           | 9AS2                       | 31    | Sense        | gagactcgctccactcc         |
| mExon IV     | mBDNF 4           | 9AS2                       | 31    | Sense        | gctgccttgatgttacttga      |
| mExon IV-GFP | mExon 4-GFP S     | GFP AS                     | 17    | Sense        | ccctccccctttaactgaa       |
| mExon V      | mBDNF 5           | 9AS2                       | 31    | Sense        | tcgcttttctagctttgtgg      |
| mExon VI     | mBDNF 6           | 9AS2                       | 31    | Sense        | agcgtgacaacaatgtgact      |
| mExon VIIA   | mBDNF 7A          | 9AS2                       | 31    | Sense        | ctcctgaggaagtgaagtgttg    |
| mExon VIIB   | mBDNF 7B          | 9AS4                       | 88    | Sense        | ctgtatccgacctctgtcc       |
| mExon VIII   | mBDNF 8           | 9AS2                       | 31    | Sense        | tgtcgctgcgcctcagtgagccga  |
| mExon IXA    | mBDNF 9A          | 9AS2                       | 31    | Sense        | ttacaagcagatgggccacat     |
| mExon IX     | mBDNF 9 coding    | 9CAS                       | 86    | Sense        | gtcacagcggcagataa         |
| CyclophilinD | CyclophilinD-S    | CyclophilinD-AS            | 21    | Sense        | atggtgaaaaacctgcaaaa      |
| mExon IX     | mBDNF 9-AS1       | 1                          |       | Antisense    | tgcaaccgaagtatgaaataacc   |
| mExon IX     | mBDNF 9-AS2       | 2A, 2B, 2C, 3, 4,<br>5, 7A |       | Antisense    | aaggtaggtcatcactcttctca   |
| mExon IX     | mBDNF 9-AS4       | 7B                         |       | Antisense    | cacacaccacagccttctc       |
| mExon IX     | mBDNF 9-AS6       | 2C                         |       | Antisense    | aaccatagtaaggaaaaggatggtc |
| mExon IX     | mBDNF 9 coding-AS | 9C                         |       | Antisense    | gacctttcaaggactgtgacc     |
| mExon IV-GFP | GFP-AS            | 4-GFP-S                    |       | Antisense    | tccagctcgaccaggatg        |
| CyclophilinD | CyclophilinD-AS   | CyclophilinD-S             |       | Antisense    | catcctcaggaagtctgga       |
